# Supplementary material for: Urinary Metabolite Profiling to Non-Invasively Monitor the Omega-3 Index: An Exploratory Secondary Analysis of a Randomized Clinical Trial in Young Adults
Source: MDPI journal article supplement (doi:10.3390/metabo13101071), 2023-10-12
Supplement: s1 [file s1]

# SUPPLEMENTARY FILE

## **Urinary metabolite profiling to non-invasively monitor the omega-3 index: An exploratory secondary analysis of a randomized clinical trial in young adults.**

Brittany C. MacIntyre<sup>1</sup>, Meera Shanmuganathan<sup>2</sup>, Shannon L. Klingel<sup>1</sup>, Adrian Chabowski<sup>3</sup>, Zachary Kroezen<sup>2</sup>, Erick Helmeczi<sup>2</sup>, Na-Yung Seoh<sup>2</sup>, Vanessa Martinez<sup>2</sup>, Zeny Feng<sup>4</sup>, Philip Britz-McKibbin<sup>2,\*</sup>, and David M. Mutch<sup>1,\*</sup>

<sup>1</sup>*Department of Human Health and Nutritional Sciences, University of Guelph, Guelph, Ontario, Canada*

<sup>2</sup>*Department of Chemistry and Chemical Biology, McMaster University, Hamilton, Ontario, Canada*

<sup>3</sup>*Department of Physiology, Medical University of Bialystok, Bialystok, Poland*

<sup>4</sup>*Department of Mathematics & Statistics, University of Guelph, Guelph, Ontario, Canada*

### **\*Corresponding Authors:**

P. Britz-McKibbin, McMaster University, Department of Chemistry and Chemical Biology, 1280 Main St. W., Hamilton, ON, Canada L8S 4L8 (e-mail: [britz@mcmaster.ca](mailto:britz@mcmaster.ca))

D.M. Mutch, University of Guelph, Department of Human Health & Nutritional Science, 50 Stone Rd. E., Guelph, ON, Canada N1G 2W1 (e-mail: [dmutch@uoguelph.ca](mailto:dmutch@uoguelph.ca))

---

**Table S1:** Full annotation of the 17 urinary metabolites significantly associated with n3-LCPUFA supplementation or the O3I reported in Table 3.

| Metabolite/Identifier <sup>1</sup>                 | m/z:RMT:mode <sup>2</sup> | Molecular Formula <sup>2</sup>                                               | Mass Error <sup>2</sup> (ppm) |
|----------------------------------------------------|---------------------------|------------------------------------------------------------------------------|-------------------------------|
| Choline                                            | 104.108:0.333:p           | C <sub>5</sub> H <sub>14</sub> NO                                            | 2.9                           |
| Tiglylglycine<br>(HMDB0000959)                     | 156.066:0.843:n           | C <sub>7</sub> H <sub>11</sub> NO <sub>3</sub>                               | 4.5                           |
| S-Carboxypropylcysteamine<br>(HMDB0002169)         | 164.074:0.613:p           | C <sub>6</sub> H <sub>13</sub> NO <sub>2</sub> S                             | 1.8                           |
| N1-Acetylspermidine<br>(HMDB0001276)               | 188.175:0.259:p           | C <sub>9</sub> H <sub>21</sub> N <sub>3</sub> O                              | 6.4                           |
| Quinic acid<br>(HMDB0003072)                       | 191.056:0.798:n           | C <sub>7</sub> H <sub>12</sub> O <sub>6</sub>                                | 4.2                           |
| Glucuronic acid<br>(HMDB0000127)                   | 193.035:0.772:n           | C <sub>6</sub> H <sub>10</sub> O <sub>7</sub>                                | 2.6                           |
| Tryptophan                                         | 205.098:0.899:p           | C <sub>11</sub> H <sub>12</sub> N <sub>2</sub> O <sub>2</sub>                | 2.9                           |
| Unknown dianion [M-H <sub>2</sub> ] <sup>2-</sup>  | 221.075:0.927:n           | C <sub>22</sub> H <sub>28</sub> N <sub>4</sub> O <sub>2</sub> S <sub>2</sub> | --                            |
| Carboxybutylhomocysteine                           | 222.080:0.762:p           | C <sub>8</sub> H <sub>15</sub> NO <sub>4</sub> S                             | 2.7                           |
| O-Butyrylcarnitine<br>(HMDB0002013)                | 232.155:0.718:p           | C <sub>8</sub> H <sub>10</sub> NO <sub>4</sub>                               | 4.7                           |
| Pyroglutamylisoleucine<br>(HMDB0341381)            | 241.120:0.653:n           | C <sub>11</sub> H <sub>18</sub> N <sub>2</sub> O <sub>4</sub>                | 6.7                           |
| Pyroglutamylleucine<br>(HMDB0341382)               | 241.120:0.662:n           | C <sub>11</sub> H <sub>18</sub> N <sub>2</sub> O <sub>4</sub>                | 3.0                           |
| Unknown cation isobar#2                            | 258.110:0.788:p           | C <sub>11</sub> H <sub>19</sub> N <sub>3</sub> S <sub>2</sub>                | --                            |
| Unknown cation                                     | 300.215:0.841:p           | C <sub>17</sub> H <sub>25</sub> N <sub>5</sub>                               | --                            |
| Tetrahydroaldosterone<br>glucuronide (HMDB0010357) | 539.249:0.472:n           | C <sub>27</sub> H <sub>40</sub> O <sub>11</sub>                              | 0.6                           |
| Unknown dianion [M-H <sub>2</sub> ] <sup>2-</sup>  | 88.004:1.622:n            | C <sub>4</sub> H <sub>6</sub> N <sub>2</sub> O <sub>6</sub>                  | 5.7                           |
| Symmetric dimethylarginine                         | 203.151:0.478:p           | C <sub>8</sub> H <sub>18</sub> N <sub>4</sub> O <sub>2</sub>                 | 3.4                           |

<sup>1</sup>Putative urinary metabolite identified together with their corresponding HMDB ID# if reported.

<sup>2</sup>All urinary metabolites were annotated based on their accurate mass, relative migration time and ionization mode (m/z:RMT:mode), most likely molecular formulae, and mass error (if structure known).

**Table S2:** glmmlasso selected urinary metabolites on the Omega-3 Index (O3I) and EPA+DHA (ng/mg Hb) integrated datasets.

| Metabolite <sup>1</sup>                           | m/z:RMT:mode    | O3I Outcome |         | EPA+DHA (ng/mg Hb) Outcome |         |
|---------------------------------------------------|-----------------|-------------|---------|----------------------------|---------|
|                                                   |                 | Estimate    | P value | Estimate                   | P value |
| Unknown dianion [M-H <sub>2</sub> ] <sup>2-</sup> | 221.068:0.927:n | 1.079       | < 0.001 | 0.832                      | < 0.001 |
| S-Carboxypropylcysteamine                         | 164.074:0.613:p | 0.501       | < 0.001 | 0.535                      | < 0.001 |
| Tetrahydroaldosterone glucuronide                 | 539.249:0.472:n | 0.365       | < 0.001 | 0.264                      | < 0.001 |
| N1-Acetylspermidine                               | 188.175:0.259:p | -0.538      | < 0.001 | -0.858                     | < 0.001 |
| Symmetric dimethylarginine                        | 203.151:0.478:p | -           | -       | 0.551                      | < 0.001 |
| Tryptophan                                        | 205.098:0.899:p | -           | -       | 0.166                      | < 0.001 |
| Carboxybutylhomocysteine                          | 222.080:0.762:p | -           | -       | -0.234                     | < 0.001 |

<sup>1</sup>Putative urinary metabolite as annotated by its accurate mass, relative migration time and ionization mode (m/z:RMT:mode). Most likely molecular formulae are provided for unknown chemical structures.

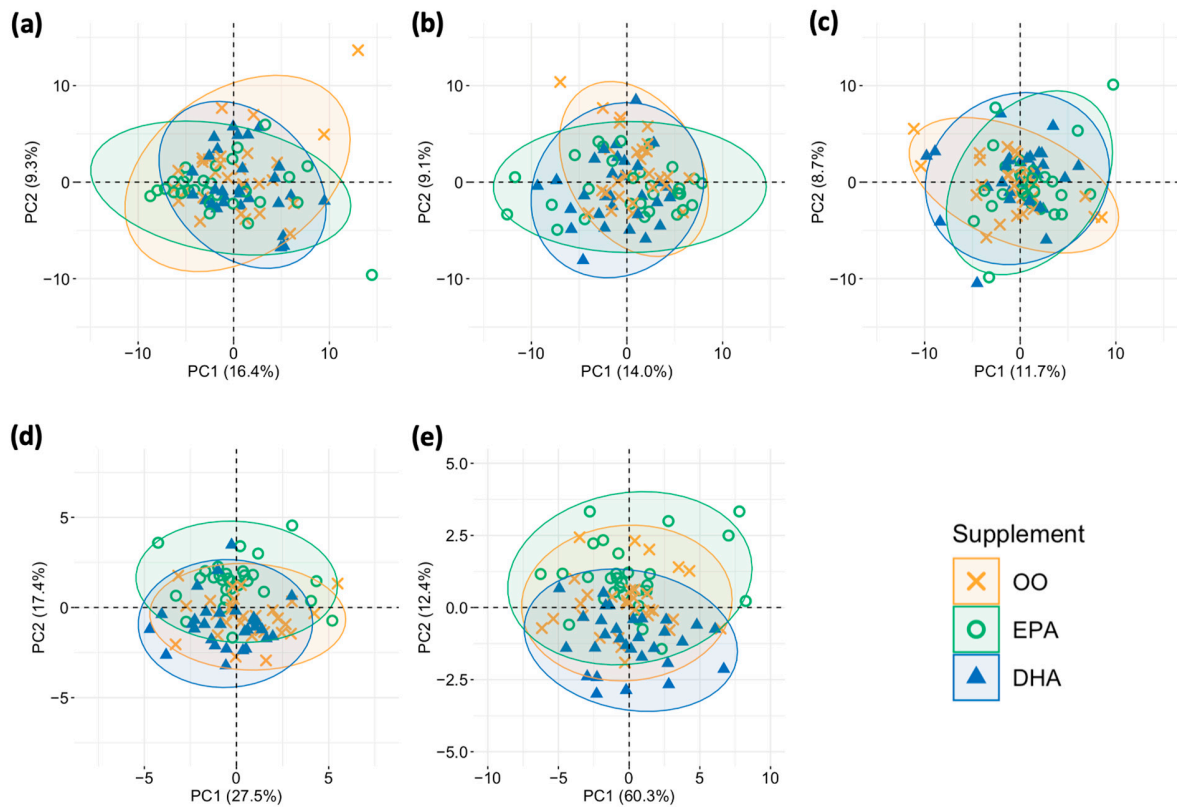

**Figure S1.** PCA plots of (a) baseline and (b) final (12 weeks) of 124 creatinine-normalized urinary metabolites for control (OO), EPA, and DHA groups (OO = orange, EPA = green, DHA = blue). Total variation explained in PC1 and PC2 plots was 25.7% and 23.1% respectively for each time point (a, b). (c) PCA plots for 88 participant delta values of 124 urinary metabolites using RPA; (d) 15 qualitative FA measurements (relative % FA), and (e) 15 quantitative FA measurements (ng FA/mg Hb). Total variation explained in PC1 and PC2 plots was 20.4%, 44.9%, 72.7% respectively for each dataset (c-e).

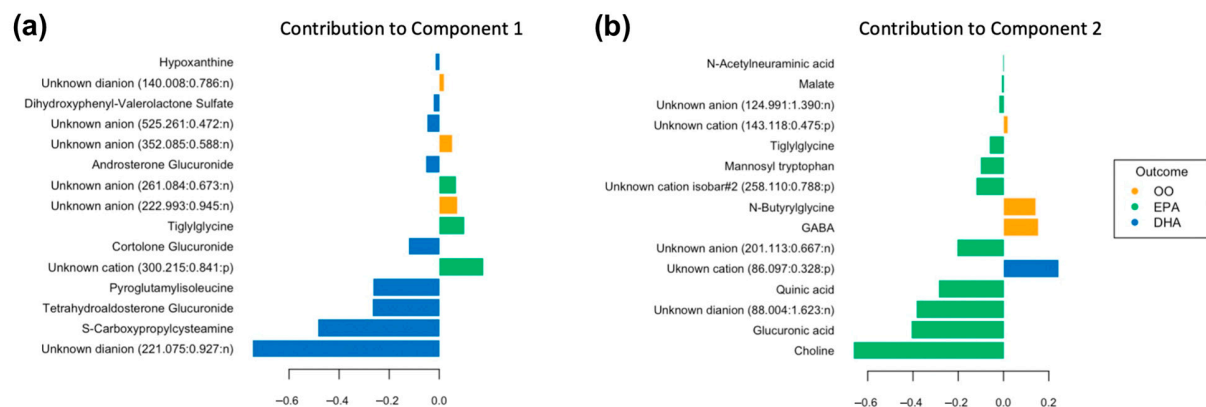

**Figure S2.** sPLS-DA loading weights reflecting the contribution for 15 urinary metabolites on (a) PC1 and (b) PC2 coloured by group (OO = orange, EPA = green, DHA = blue). All unknown metabolites are annotated based on their characteristic  $m/z$ :RMT:mode.

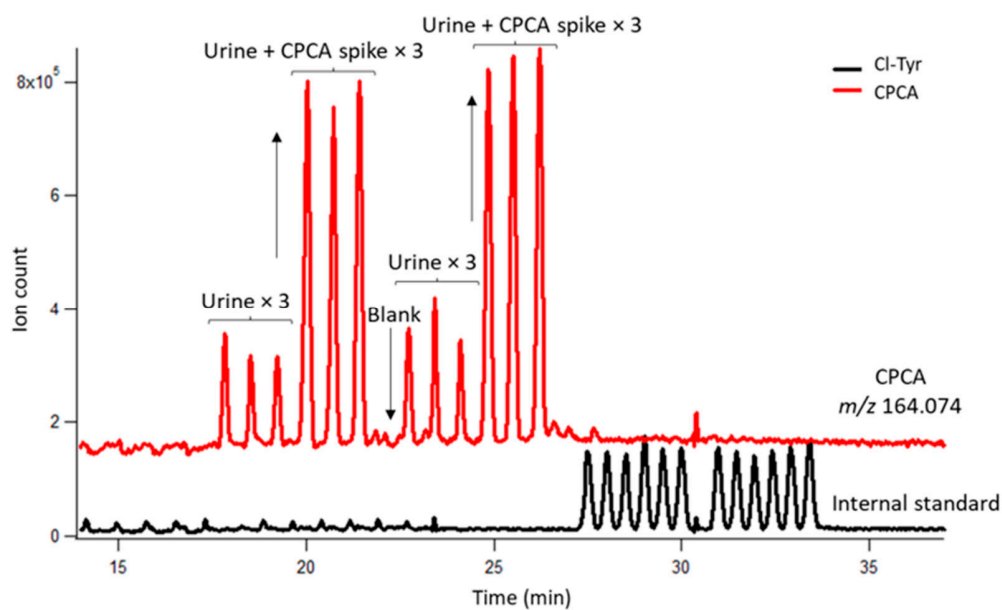

**Figure S3.** Tentative identification of CPCA based on spiking into pooled urine when using MSI-CE-MS with a 13 serial sample injection format, which confirmed its co-migration with the unknown sulfur-containing metabolite ( $m/z$  164.074) under positive ion mode conditions.

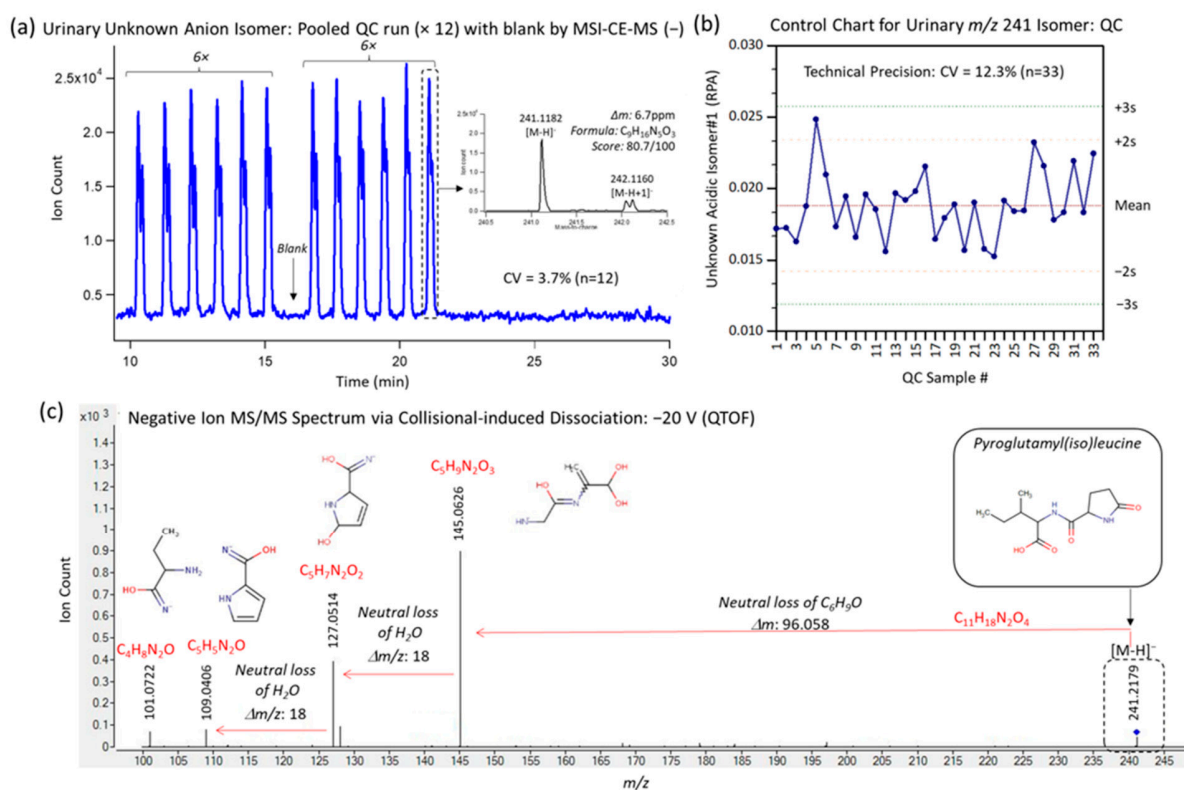

**Figure S4.** Tentative identification of two unknown anionic urinary metabolites that migrate as partially resolved isomers by MSI-CE-MS under negative ion mode conditions. **(a)** Representative extracted ion electropherogram (EIE) when using MSI-CE-MS under negative ion mode for the unknown anion isomer highlighting a serial injection of 12 urine samples and a blank in a single run. The first migrating isomer (241.120:0.653:n) was determined as the third most significant urinary metabolite associated with the O3I notably following DHA ingestion. **(b)** Technical precision of first migrating unknown anion isomer in QC samples (CV = 12.3%, n = 33). **(c)** Annotation of the first migrating unknown anion isomer MS/MS at an optimal collision energy, tentatively identified as pyroglutamylisoleucine (pGlu-Ile), whereas its slower migrating isomer is likely pyroglutamylleucine (pGlu-Leu).

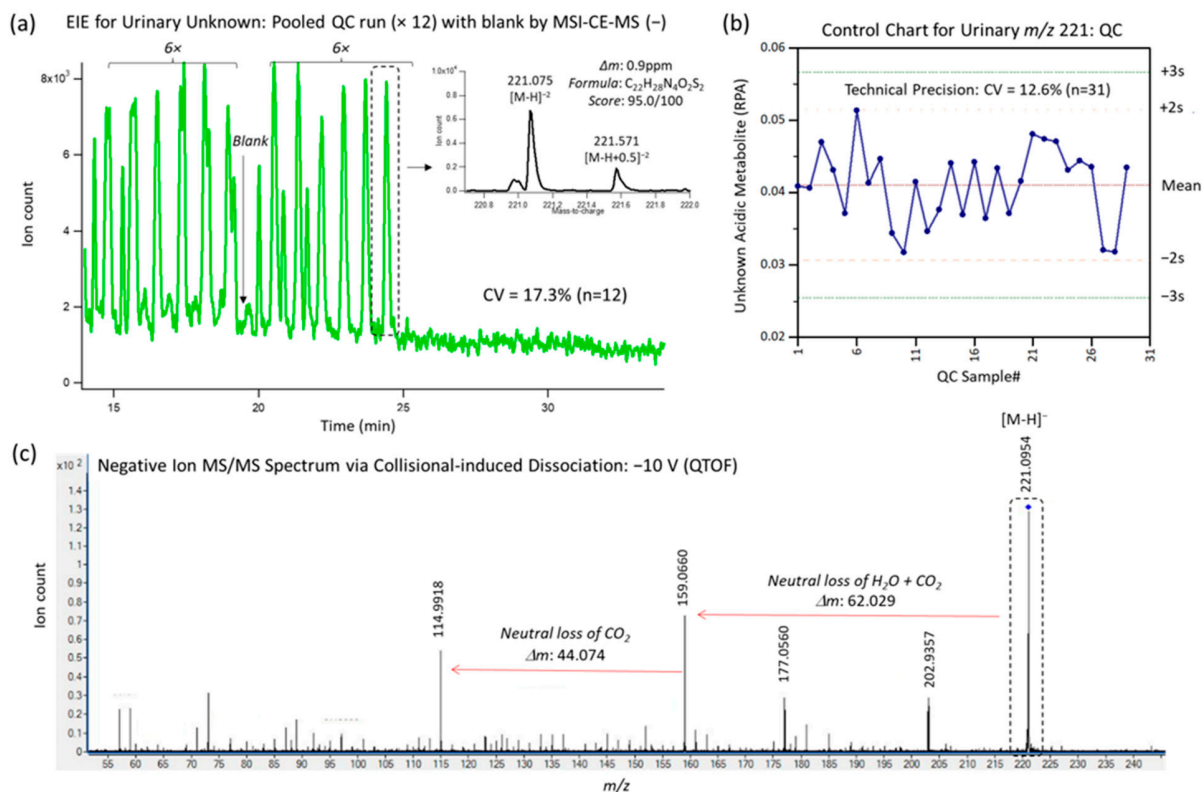

**Figure S5.** Annotation of an unknown urinary dianion ( $221.075:0.927:n$ ;  $[M-2H]^{2-}$ ) based on its (a) extracted ion electropherogram (EIE) when using MSI-CE-MS under negative ion mode demonstrating a charge state (i.e., isotopic pattern) that was associated with DHA supplementation. Although this acidic metabolite was measured with (b) adequate technical precision in QC samples ( $CV < 15\%$ ,  $n = 31$ ), its low abundance prevented acquisition of a good quality MS/MS spectra under negative ion mode conditions. (c) Collisional-induced dissociation experiments confirmed the likely presence of two acidic functional moieties ( $-COOH$ ) based on corresponding neutral mass losses.



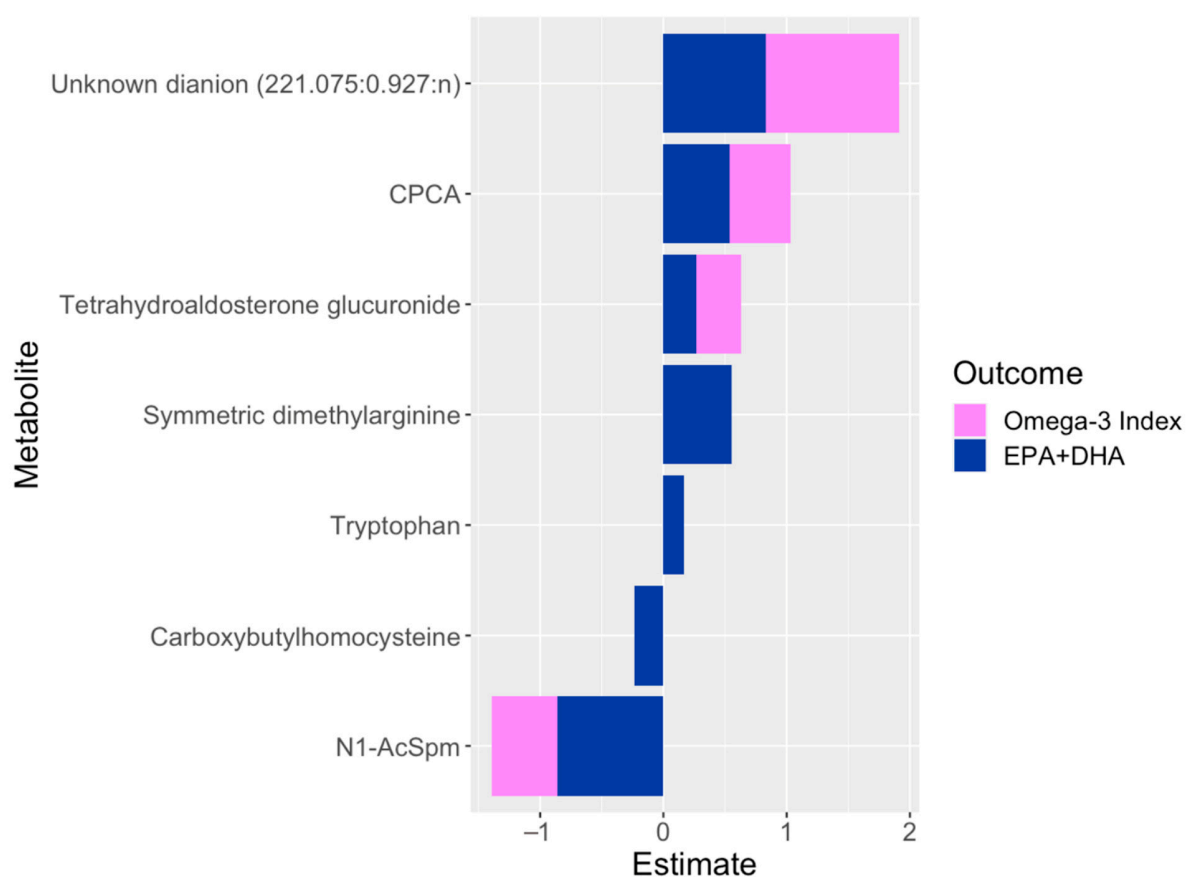

**Figure S6.** Estimate values for glmLasso urinary metabolites from two integrated datasets with scaled from 0-10 or 80-700 urine metabolites as covariates and the O3I or EPA+DHA (ng/mg Hb), respectively, as outcome variables. Urinary metabolites with a positive estimate result indicate a positive association with the outcome variable and metabolites with a negative estimate result indicate a negative association with the outcome variable. Estimates from values from the O3I (pink) and EPA+DHA (ng/mg Hb) (navy) are depicted in stacked bars. Unknown metabolites were annotated based on their characteristic m/z:RMT:mode. CPCA = 2-Carboxypropylcysteamine, N1-AcSpm = N1-Acetylspermidine.

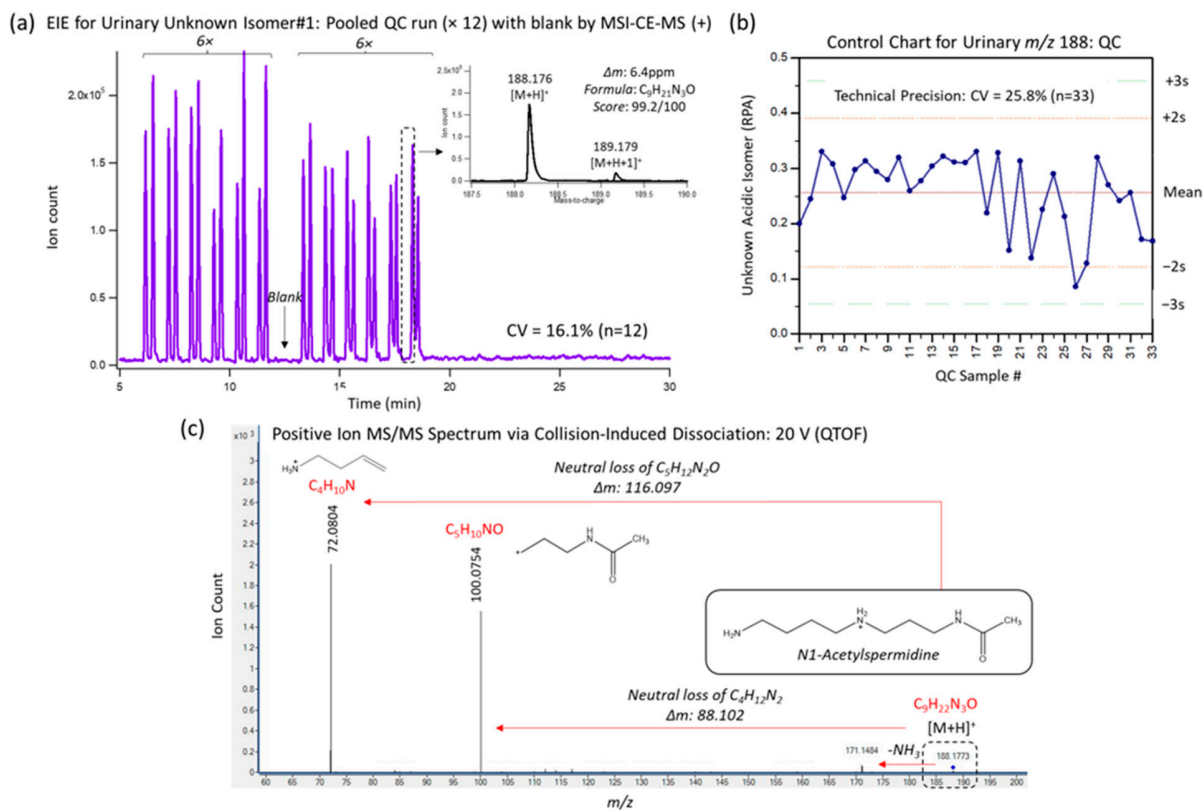

**Figure S7.** Tentative identification of two unknown cationic urinary metabolites that (a) migrate as partially resolved isomers by MSI-CE-MS under positive ion mode conditions. However, only the first migrating isomer (188.175:0.259:p) was associated with the O3I. (b) This unknown isomer was measurable with acceptable technical precision in QC samples. (c) Annotation of this first migrating isomer MS/MS at an optimal collision energy, tentatively identified as *N1*-acetylspermidine (*N1*-AcSpm), whereas its slower migrating isomer is likely *N8*-acetylspermidine (*N8*-AcSpm).

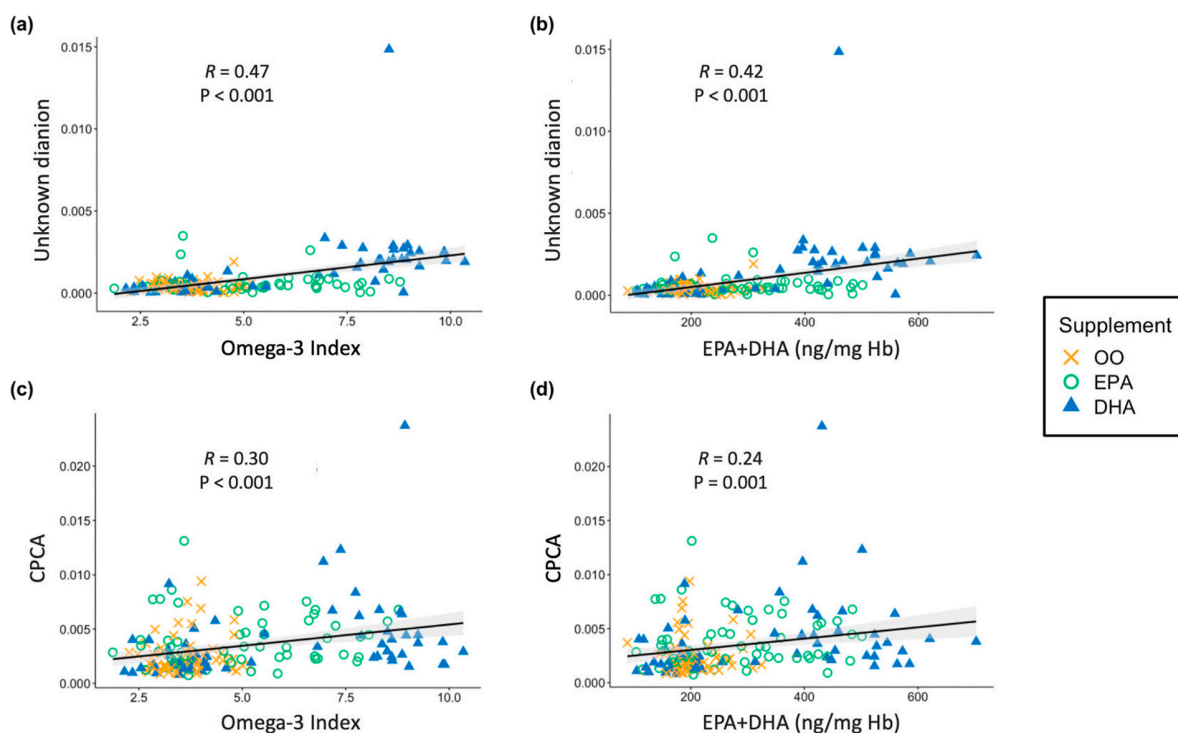

**Figure S8.** Correlation plots for the (a) unknown dianion (221.075:0.927:n) and the O3I ( $R = 0.47$ ,  $P < 0.001$ ); (b) unknown dianion (221.075:0.927:n) and the sum of EPA+DHA (ng/mg Hb) ( $R = 0.42$ ,  $P < 0.001$ ); (c) S-carboxypropylcysteamine (CPCA; 164.074:0.613:p) and the O3I ( $R = 0.30$ ,  $P < 0.001$ ); and (d) CPCA and the sum of EPA+DHA (ng/mg Hb) ( $R = 0.24$ ,  $P = 0.001$ ). OO = yellow, EPA = green, DHA = blue.
